# Supplementary material
Source: publisher figshare collection journal article supplement (https://acs.figshare.com/ndownloader/files/4686781)

# An Efficient, Inexpensive and Shelf-Stable Diazotransfer Reagent: Imidazole-1-sulfonyl Azide Hydrochloride

Ethan D. Goddard-Borger\* and Robert V. Stick

*Chemistry M313, School of Biomedical, Biomolecular & Chemical Sciences,  
The University of Western Australia, Crawley WA 6009, Australia*

## SUPPORTING INFORMATION

### Experimental Section

General experimental procedures have been given previously.<sup>1</sup>

#### Other General Procedures

##### Procedure A – Preparation of azides (with a subsequent acetylation)

Imidazole-1-sulfonyl azide hydrochloride **1.HCl** (0.25 g, 1.2 mmol) was added to the amine or ammonium salt substrate (1.0 mmol),  $K_2CO_3$  ( $n + 0.5$  mmol)<sup>2</sup> and  $CuSO_4 \cdot 5H_2O$  (2.5 mg, 10  $\mu$ mol) in MeOH (5 mL) and the mixture stirred at room temperature for the specified time (Table 1).<sup>3</sup> The mixture was concentrated and co-evaporated with PhMe ( $2 \times 10$  mL). Acetic anhydride (0.76 mL, 8.0 mmol) was added to the residue in  $C_5H_5N$  (5 mL) and the mixture stirred (3 h.). The mixture was concentrated, diluted with  $H_2O$  (20 mL) and extracted with EtOAc ( $3 \times 15$  mL). The combined organic layers were dried ( $MgSO_4$ ), filtered and concentrated. Flash chromatography gave the azide.

##### Procedure B – Preparation of azides

Imidazole-1-sulfonyl azide hydrochloride **1.HCl** (0.25 g, 1.2 mmol) was added to the amine or ammonium salt substrate (1.0 mmol),  $K_2CO_3$  ( $n + 0.5$  mmol)<sup>2</sup> and  $CuSO_4 \cdot 5H_2O$  (2.5 mg, 10  $\mu$ mol) in MeOH (5 mL) and the mixture stirred at room temperature for the specified time (Table 1).<sup>3</sup> The mixture was concentrated, diluted with  $H_2O$  (15 mL), acidified with conc. HCl and extracted with EtOAc ( $3 \times 10$  mL). The combined organic layers were dried ( $MgSO_4$ ), filtered and concentrated. Flash chromatography gave the azide.

##### Procedure C – Preparation of diazo compounds

Imidazole-1-sulfonyl azide hydrochloride **1.HCl** (0.25 g, 1.2 mmol) was added to the substrate (1.0 mmol) and the specified base (5.0 mmol) in MeCN (5 mL) and the mixture stirred at 40°C for the specified time (Table 2).<sup>3</sup> The mixture was diluted with EtOAc (15 mL), washed with hydrochloric acid ( $2 \times 15$  mL, 1 M),  $H_2O$  (15 mL), dried ( $MgSO_4$ ), filtered and concentrated. Flash chromatography gave the diazo compound.

(1) Scaffidi, A.; Skelton, B. W.; Stick, R. V.; White, A. H. *Aust. J. Chem.* **2006**, 59, 426–433.

(2) Where 'n' is the number of mols of acid in the system. For example: the reaction of **1.HCl** (1.2 mmol) and the amino acid L-valine (1.0 mmol) requires  $n = 2.2$  mmol.

(3) Please refer to the Tables held within the paper.

### ***Imidazole-1-sulfonyl Azide 1***

Sulfonyl chloride (0.40 mL, 5.0 mmol) was added drop-wise to an ice-cooled suspension of NaN<sub>3</sub> (0.32 g, 5.0 mmol) in MeCN (5 mL) and the mixture stirred overnight at room temperature. Imidazole (0.68 g, 10 mmol) was added to the ice-cooled mixture and the resulting slurry stirred for 3 h. at room temperature. The mixture was diluted with EtOAc (10 mL) and H<sub>2</sub>O (10 mL) and the aqueous layer separated and discarded. The organic layer was washed with H<sub>2</sub>O (10 mL) then saturated aqueous NaHCO<sub>3</sub> (2 × 15 mL), dried over MgSO<sub>4</sub> and filtered. Concentration of the filtrate and flash chromatography (EtOAc/petrol, 1:3) gave **1** as a colourless liquid (0.62 g, 72%). IR  $\nu_{\text{max}}$  (film) 2171, 1387 and 1172 cm<sup>-1</sup>. <sup>1</sup>H NMR (600 MHz, CDCl<sub>3</sub>)  $\delta$  = 7.17 (dd, 1 H,  $J$  = 0.8, 1.7 Hz, H-4), 7.35 (dd, 1 H,  $J$  = 1.4, 1.7 Hz, H-5), 7.96 (dd, 1 H,  $J$  = 0.8, 1.4 Hz, H-2); <sup>13</sup>C NMR (150.9 MHz, CDCl<sub>3</sub>)  $\delta$  = 117.7 (C-5), 131.9 (C-4), 136.7 (C-2). HRMS (EI):  $m/z$  = 173.0013; [M]<sup>+</sup> requires 173.0010. Anal. Calcd. For C<sub>3</sub>H<sub>3</sub>N<sub>5</sub>O<sub>2</sub>S: C, 20.81; H, 1.75; N, 40.45. Found: C, 20.93; H, 1.79; N, 40.22.

### ***Imidazole-1-sulfonyl Azide Hydrochloride 1.HCl***

Sulfonyl chloride (16.1 mL, 200 mol) was added drop-wise to an ice-cooled suspension of NaN<sub>3</sub> (13.0 g, 200 mmol) in MeCN (200 mL) and the mixture stirred overnight at room temperature. Imidazole (25.9 g, 380 mmol) was added portion-wise to the ice-cooled mixture and the resulting slurry stirred for 3 h. at room temperature. The mixture was diluted with EtOAc (400 mL), washed with H<sub>2</sub>O (2 × 400 mL) then saturated aqueous NaHCO<sub>3</sub> (2 × 400 mL), dried over MgSO<sub>4</sub> and filtered. A solution of HCl in EtOH [obtained by the drop-wise addition of AcCl (21.3 mL, 300 mmol) to ice-cooled dry ethanol (75 mL)] was added drop-wise to the filtrate with stirring, the mixture chilled in an ice-bath, filtered and the filter cake washed with EtOAc (3 × 100 mL) to give **1.HCl** as colourless needles (26.4 g, 63%), m.p. 100–102°C.<sup>4</sup> IR  $\nu_{\text{max}}$  (KBr) 2173, 1384 and 1161 cm<sup>-1</sup>. <sup>1</sup>H NMR (600 MHz, D<sub>2</sub>O)  $\delta$  = 7.68 (dd, 1 H,  $J$  = 1.3, 2.2 Hz, H-4), 8.09 (dd, 1 H,  $J$  = 1.6, 2.2 Hz, H-5), 9.53 (dd, 1 H,  $J$  = 1.3, 1.6 Hz, H-2); <sup>13</sup>C NMR (150.9 MHz, D<sub>2</sub>O)  $\delta$  = 120.8, 123.4, 138.3. HRMS (FAB):  $m/z$  = 174.0072; [M – Cl]<sup>+</sup> requires 174.0081. Anal. Calcd. For C<sub>3</sub>H<sub>4</sub>ClN<sub>5</sub>O<sub>2</sub>S: C, 17.19; H, 1.92; N, 33.41. Found: C, 17.30; H, 1.99; N, 33.13.

### ***1,3,4,6-Tetra-O-acetyl-2-azido-2-deoxy-D-glucose***

- 1) D-Glucosamine hydrochloride (216 mg, 1.00 mmol) was treated according to Procedure A, with the use of **1** (1.20 mmol) instead of **1.HCl** [flash chromatography (EtOAc/petrol, 1:3)], to give 1,3,4,6-tetra-*O*-acetyl-2-azido-2-deoxy-D-glucose as a colourless gum (343 mg, 92%). The IR, <sup>1</sup>H and <sup>13</sup>C NMR spectroscopic data were in agreement with those published.<sup>5</sup> Anal. Calcd. For C<sub>14</sub>H<sub>19</sub>N<sub>3</sub>O<sub>9</sub>: C, 45.04; H, 5.13; N, 11.26. Found: C, 45.19; H, 5.04; N, 11.07.
- 2) D-Glucosamine hydrochloride (10.8 g, 50.0 mmol) was treated according to Procedure A [flash chromatography (EtOAc/petrol, 1:3)] to give 1,3,4,6-tetra-*O*-acetyl-2-azido-2-deoxy-D-glucose as a colourless gum (17.2 g, 92%).

(4) The evolution of gas from the melt of **1.HCl** suggests decomposition upon melting – see the DSC trace on page six. Please note that DSC on an identical sample suggests a melting point of 94°C, different to the 100–102°C obtained on a hot stage melting apparatus.

(5) Vasella, A.; Witzig, C.; Chiara, J.-L.; Martin-Lomas, M. *Helv. Chim. Acta* **1991**, 74, 2073–2077.

### ***1,3,4,6-Tetra-O-acetyl-2-azido-2-deoxy-D-galactose***

D-Galactosamine hydrochloride (108 mg, 0.500 mmol) was treated according to Procedure A [flash chromatography (EtOAc/petrol, 1:3)] to give 1,3,4,6-tetra-*O*-acetyl-2-azido-2-deoxy-D-galactose as a colourless gum (162 mg, 87%). The IR,  $^1\text{H}$  and  $^{13}\text{C}$  NMR spectroscopic data were in agreement with those published.<sup>5</sup> Anal. Calcd. For  $\text{C}_{14}\text{H}_{19}\text{N}_3\text{O}_9$ : C, 45.04; H, 5.13; N, 11.26. Found: C, 45.28; H, 5.28; N, 11.11.

### ***(2S)-2-Azido-3-methylbutanoic acid***

L-Valine (117 mg, 1.00 mmol) was treated according to Procedure B [flash chromatography (EtOAc/petrol/AcOH, 20:79:1)] to give (2*S*)-2-azido-3-methylbutanoic acid as a pale yellow oil (120 mg, 84%).  $[\alpha]_{\text{D}} = -46.5$  ( $c = 1.0$  in  $\text{CHCl}_3$ , lit.<sup>6</sup>  $[\alpha]_{\text{D}} = -47.8$ ). The  $^1\text{H}$  and  $^{13}\text{C}$  NMR spectroscopic data were in agreement with those published.<sup>6</sup>

### ***(2S)-2-Azido-4-methylpentanoic acid***

L-Leucine (131 mg, 1.00 mmol) was treated according to Procedure B [flash chromatography (EtOAc/petrol/AcOH, 15:84:1)] to give (2*S*)-2-azido-4-methylpentanoic acid as a pale yellow oil (134 mg, 85%).  $[\alpha]_{\text{D}} = -13.8$  ( $c = 1.0$  in  $\text{CHCl}_3$ , lit.<sup>6</sup>  $[\alpha]_{\text{D}} = -13.0$ ). The  $^1\text{H}$  and  $^{13}\text{C}$  NMR spectroscopic data were in agreement with those published.<sup>6</sup>

### ***(2S)-2-Azido-3-phenylpropanoic Acid***

L-Phenylalanine (165 mg, 1.00 mmol) was treated according to Procedure B [flash chromatography (EtOAc/petrol/AcOH, 10:89:1)] to give (2*S*)-2-azido-3-phenylpropanoic acid as a pale yellow oil (143 mg, 75%).  $[\alpha]_{\text{D}} = -72.1$  ( $c = 1.0$  in  $\text{CHCl}_3$ , lit.<sup>6</sup>  $[\alpha]_{\text{D}} = -74.2$ ). The  $^1\text{H}$  and  $^{13}\text{C}$  NMR spectroscopic data were in agreement with those published.<sup>6</sup> Anal. Calcd. For  $\text{C}_9\text{H}_9\text{N}_3\text{O}_2$ : C, 56.54; H, 4.74; N, 21.98. Found: C, 56.45; H, 4.92; N, 21.74.

### ***(2S)-2,6-Diazidohexanoic Acid***

L-Lysine hydrochloride (183 mg, 1.00 mmol) was treated according to Procedure B, with the addition of  $\text{H}_2\text{O}$  (5 mL) as a co-solvent [flash chromatography (EtOAc/petrol/AcOH, 10:89:1)], to give (2*S*)-2,6-diazidohexanoic acid as a pale yellow oil (131 mg, 66%).  $[\alpha]_{\text{D}} = -49.3$ . IR  $\nu_{\text{max}}$  (film) 2178, 1683  $\text{cm}^{-1}$ .  $^1\text{H}$  NMR (600 MHz,  $\text{CDCl}_3$ )  $\delta = 1.50\text{--}1.68$  (m, 4 H, H-4,5), 1.78–1.95 (m, 2 H, H-3), 3.30–3.33 (m, 2 H, H-6), 3.95 (dd, 1 H,  $J = 5.1, 8.4$  Hz, H-2);  $^{13}\text{C}$  NMR (150.9 MHz,  $\text{CDCl}_3$ )  $\delta = 23.1$  (C-4), 28.5 (C-5), 31.0 (C-3), 51.2 (C6), 61.7 (C2), 175.2 (C-1). HRMS (EI):  $m/z = 198.0883$ ;  $[\text{M}]^{+\bullet}$  requires 198.0871. Anal. Calcd. For  $\text{C}_6\text{H}_{10}\text{N}_6\text{O}_2$ : C, 36.36; H, 5.09; N, 42.41. Found: C, 36.21; H, 5.28; N, 42.30.

---

(6) Lundquist, IV, J. T.; Pelletier, J. C. *Org. Lett.* **2001**, 3, 781–783.

#### **4-Azidobutanoic Acid**

4-Aminobutanoic acid (103 mg, 1.00 mmol) was treated according to Procedure B [flash chromatography (EtOAc/petrol/AcOH, 5:94:1)] to give 4-azidobutanoic acid as a pale yellow oil (93 mg, 72%). The IR,  $^1\text{H}$  and  $^{13}\text{C}$  NMR spectroscopic data were in agreement with those published.<sup>7</sup>

#### **Methyl (2S)-2-Azido-3-(4-hydroxyphenyl)propanoate**

L-Tyrosine methyl ester hydrochloride (232 mg, 1.00 mmol) was treated according to Procedure B [flash chromatography (EtOAc/petrol, 1:3)] to give methyl (2S)-2-azido-3-(4-hydroxyphenyl)propanoate as a pale yellow oil (199 mg, 90%),  $[\alpha]_{\text{D}} = -10.3$ . IR  $\nu_{\text{max}}$  (film) 2172, 1691  $\text{cm}^{-1}$ .  $^1\text{H}$  NMR (600 MHz,  $\text{CDCl}_3$ )  $\delta$  = 2.95 (dd, 1 H,  $J$  = 8.5, 14.1 Hz, H-3), 3.10 (dd, 1 H,  $J$  = 5.4, 14.1 Hz, H-3), 3.77 (s, 3 H,  $\text{OCH}_3$ ), 4.02 (dd, 1 H,  $J$  = 5.4, 8.5 Hz, H-2), 4.88 (s, 1 H, OH), 6.77–6.80 (m, 2 H, ArH), 7.09–7.11 (m, 2 H, ArH);  $^{13}\text{C}$  NMR (150.9 MHz,  $\text{CDCl}_3$ )  $\delta$  = 37.0 (C-3), 52.8 ( $\text{OCH}_3$ ), 63.6 (C-2), 115.7–155.0 (Ar), 170.6 (C-1). HRMS (FAB):  $m/z$  = 222.0901;  $[\text{M} + \text{H}]^+$  requires 222.0888. Anal. Calcd. For  $\text{C}_{10}\text{H}_{11}\text{N}_3\text{O}_3$ : C, 54.29; H, 5.01; N, 19.00. Found: C, 54.35; H, 5.18; N, 18.79.

#### **Methyl (2S)-2-Azido-3-hydroxypropanoate**

L-Serine methyl ester hydrochloride (156 mg, 1.00 mmol) was treated according to Procedure B [flash chromatography (EtOAc/petrol, 2:3)] to give methyl (2S)-2-azido-3-hydroxypropanoate as a pale yellow oil (120 mg, 83%),  $[\alpha]_{\text{D}} = -93.4$  ( $c$  = 1.0 in  $\text{CHCl}_3$ , lit.<sup>8</sup>  $[\alpha]_{\text{D}} = -92.2$ ). The  $^1\text{H}$  and  $^{13}\text{C}$  NMR spectroscopic data were in agreement with those published.<sup>8</sup> Anal. Calcd. For  $\text{C}_4\text{H}_7\text{N}_3\text{O}_3$ : C, 33.11; H, 4.86; N, 28.96. Found: C, 32.90; H, 4.89; N, 28.82.

#### **(1S,2S)-2-Azido-1-phenyl-1,3-propanediol**

(1S,2S)-2-Amino-1-phenyl-1,3-propanediol (167 mg, 1.00 mmol) was treated according to Procedure B [flash chromatography (EtOAc/petrol, 1:3)] to give (1S,2S)-2-azido-1-phenyl-1,3-propanediol as a pale yellow oil (176 mg, 91%),  $[\alpha]_{\text{D}} = -72.0$  ( $c$  = 1.0 in  $\text{CHCl}_3$ , lit.<sup>9</sup>  $[\alpha]_{\text{D}} = -76.26$ ). The IR,  $^1\text{H}$  and  $^{13}\text{C}$  NMR spectroscopic data were in agreement with those published.<sup>9</sup>

#### **4-Azido-1-methoxybenzene**

4-Anisidine (123 mg, 1.00 mmol) was treated according to Procedure B [flash chromatography (EtOAc/petrol, 1:3)] to give 4-azido-1-methoxybenzene as a yellow oil (116 mg, 78%). The IR,  $^1\text{H}$  and  $^{13}\text{C}$  NMR spectroscopic data were in agreement with those published.<sup>10</sup>

(7) van der Peet, P.; Gannon, C. T.; Walker, I.; Dinev, Z.; Angelin, M.; Tam, S.; Ralton, J. E.; McConville, M. J.; Williams, S. J. *ChemBioChem* **2006**, 7, 1384–1391.

(8) Manabe, S.; Sakamoto, K.; Nakahara, Y.; Sisido, M.; Hohsaka, T.; Ito, Y. *Bioorg. Med. Chem.* **2002**, 10, 573–581.

(9) Hajura, S.; Karmakar, A.; Maji, T.; Medda, A. K. *Tetrahedron* **2006**, 62, 8959–1965.

(10) Liu, Q.; Tor, Y. *Org. Lett.* **2003**, 5, 2571–2572.

#### **4-Azidobenzoic acid**

4-Aminobenzoic acid (137 mg, 1.00 mmol) was treated according to Procedure B [flash chromatography (EtOAc/petrol/AcOH, 25:72:3)] to give 4-azidobenzoic acid as pale yellow crystals (139, 85%), m.p. 188.5–190 °C (lit.<sup>11</sup> m.p. 188–191 °C). The IR, <sup>1</sup>H and <sup>13</sup>C NMR spectroscopic data were in agreement with those published.<sup>10</sup>

#### **2-Azidobenzoic acid**

2-Aminobenzoic acid (137 mg, 1.00 mmol) was treated according to Procedure B [flash chromatography (EtOAc/petrol/AcOH, 25:72:3)] to give 2-azidobenzoic acid as pale yellow crystals (135 mg, 83%), m.p. 147–148.5 °C (lit.<sup>11</sup> m.p. 146–148 °C). The IR and <sup>1</sup>H NMR spectroscopic data were in agreement with those published.<sup>11</sup>

#### **Diethyl Diazomalonate**

Diethyl malonate (0.15 mL, 1.0 mmol) was treated according to Procedure C, using K<sub>2</sub>CO<sub>3</sub> (0.69 g, 5.0 mmol) as base [flash chromatography (EtOAc/petrol, 1:19)], to give diethyl diazomalonate as a yellow oil (0.12 g, 65%). The IR and <sup>1</sup>H NMR spectroscopic data were in agreement with those published.<sup>12</sup> HRMS (FAB): *m/z* = 187.0714; [M + H]<sup>+</sup> requires 187.0719. Anal. Calcd. For C<sub>7</sub>H<sub>10</sub>N<sub>2</sub>O<sub>4</sub>: C, 45.16; H, 5.41; N, 15.05. Found: C, 45.42; H, 5.23; N, 14.93.

#### **Ethyl 2-Diazoacetoacetate**

Ethyl acetoacetate (0.13 mL, 1.0 mmol) was treated according to Procedure C, using K<sub>2</sub>CO<sub>3</sub> (0.69 g, 5.0 mmol) as base [flash chromatography (EtOAc/petrol, 1:19)], to give ethyl 2-diazoacetoacetate as a yellow oil (92 mg, 59%). The IR and <sup>1</sup>H spectroscopic data were in agreement with those published.<sup>12</sup> HRMS (FAB): *m/z* = 157.0617; [M + H]<sup>+</sup> requires 157.0613. Anal. Calcd. For C<sub>6</sub>H<sub>8</sub>N<sub>2</sub>O<sub>3</sub>: C, 46.15; H, 5.16; N, 17.94. Found: C, 46.46; H, 5.28; N, 18.07.

#### **Ethyl Cyanodiazooacetate**

Ethyl cyanoacetate (0.11 mL, 1.0 mmol) was treated according to Procedure C, using pyridine (0.40 mL, 5.0 mmol) as base [flash chromatography (EtOAc/petrol, 1:19)], to give ethyl cyanodiazooacetate as a yellow oil (85 mg, 61%). The IR, <sup>1</sup>H and <sup>13</sup>C NMR spectroscopic data were in agreement with those published.<sup>13</sup> HRMS (FAB): *m/z* = 140.0463; [M + H]<sup>+</sup> requires 140.0460. Anal. Calcd. For C<sub>5</sub>H<sub>5</sub>N<sub>3</sub>O<sub>2</sub>: C, 43.17; H, 3.62; N, 30.20. Found: C, 43.15; H, 3.78; N, 30.16.

(11) Xiong, Y.; Bernardi, D.; Bratton, S.; Ward, M. D.; Battaglia, E.; Finel, M.; Drake, R. R.; Radominska-Pandya, A. *Biochemistry* **2006**, *45*, 2322–2332.

(12) Rianelli, R. de S.; de Souza, M. C. B. V.; Ferreira, V. F. *Synth. Commun.* **2004**, *34*, 951–959.

(13) Wurz, R. P.; Lin, W.; Charette, A. B. *Tetrahedron Lett.* **2003**, *44*, 8845–8848.

Sample: ImSO2N3HCl  
Size: 11.5 mg  
Method: Ramp, 5°C/min

**DSC**

Run Date: 29-Jul-2007  
Instrument: DSC Q10 V9.4 Build 287

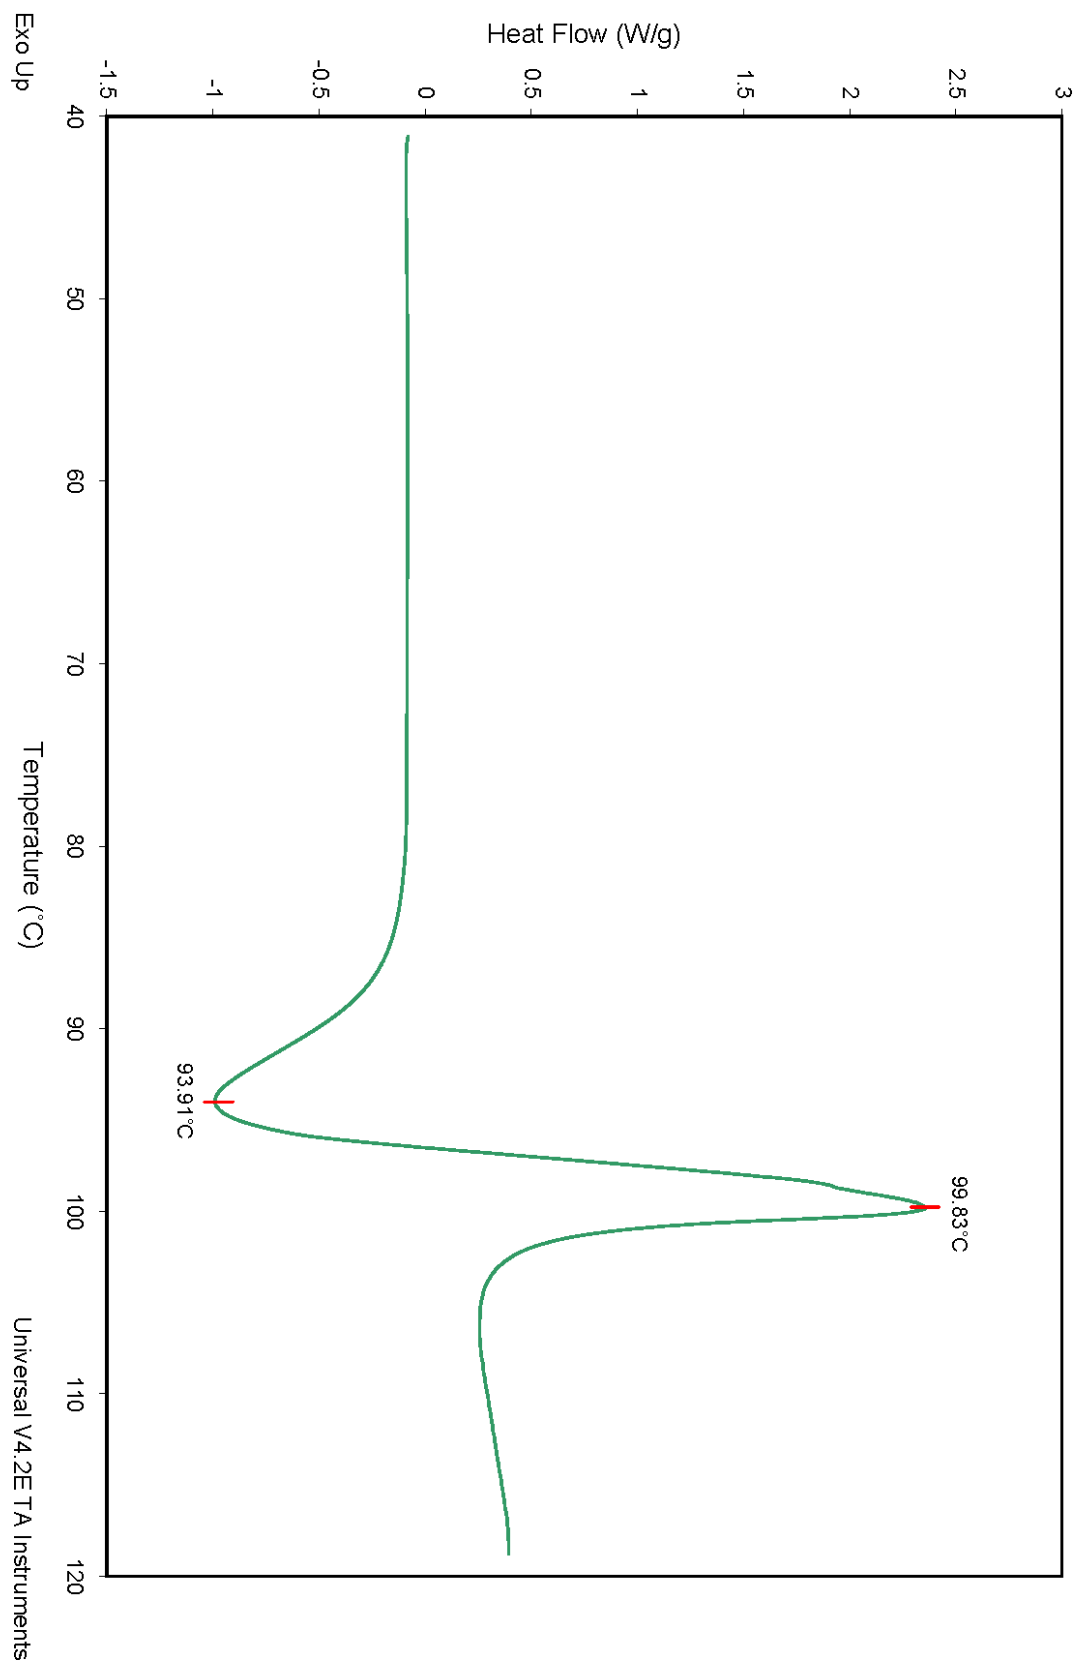

***Imidazole-1-sulfonyl Azide 1***

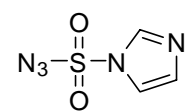

$^1\text{H}$  NMR (600 MHz,  $\text{CDCl}_3$ )

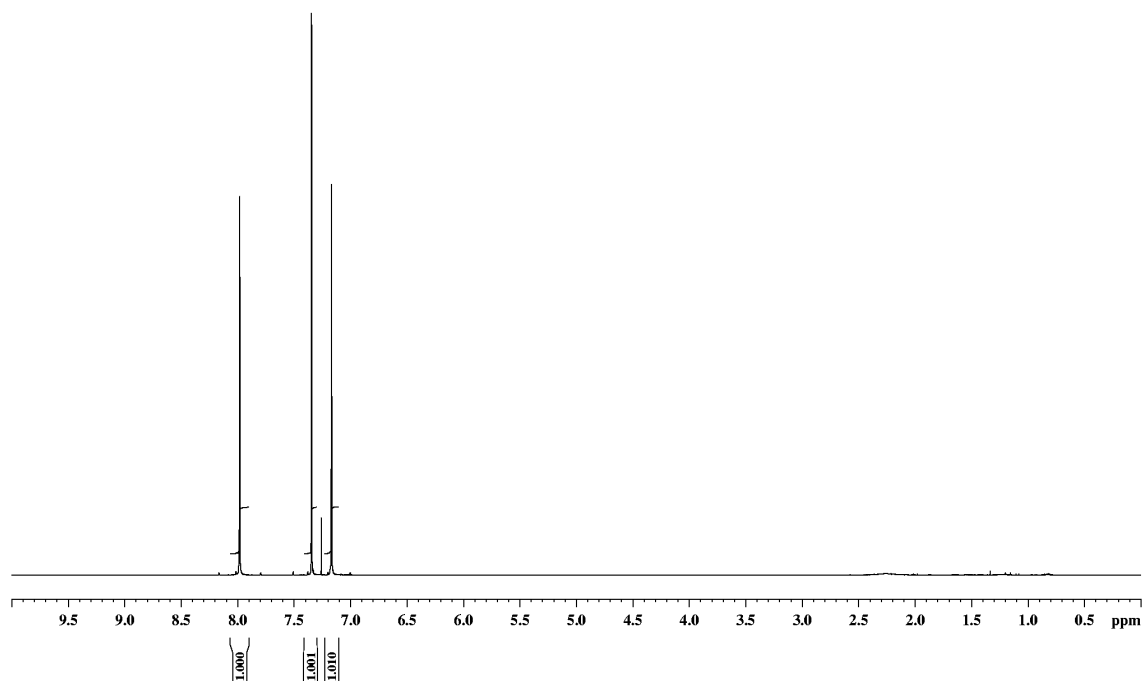

$^{13}\text{C}$  NMR (150.9 MHz,  $\text{CDCl}_3$ )

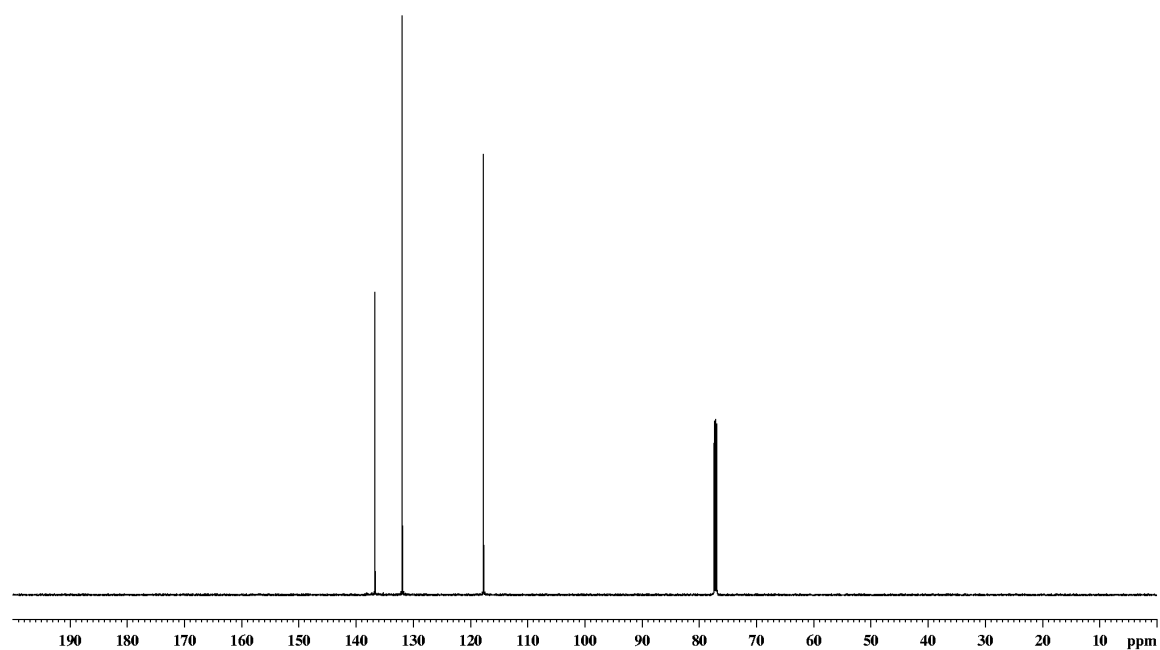

***Imidazole-1-sulfonyl Azide Hydrochloride 1.HCl***

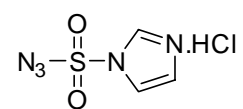

$^1\text{H}$  NMR (600 MHz,  $\text{D}_2\text{O}$ )

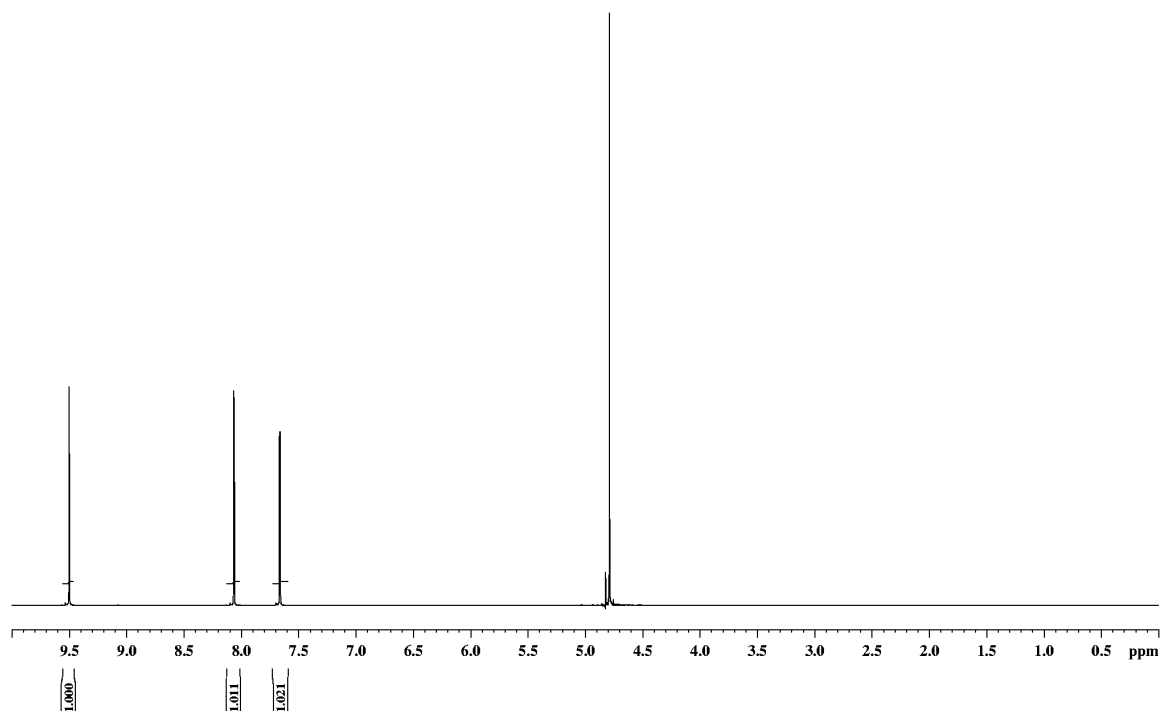

$^{13}\text{C}$  NMR (150.9 MHz,  $\text{D}_2\text{O}$ )

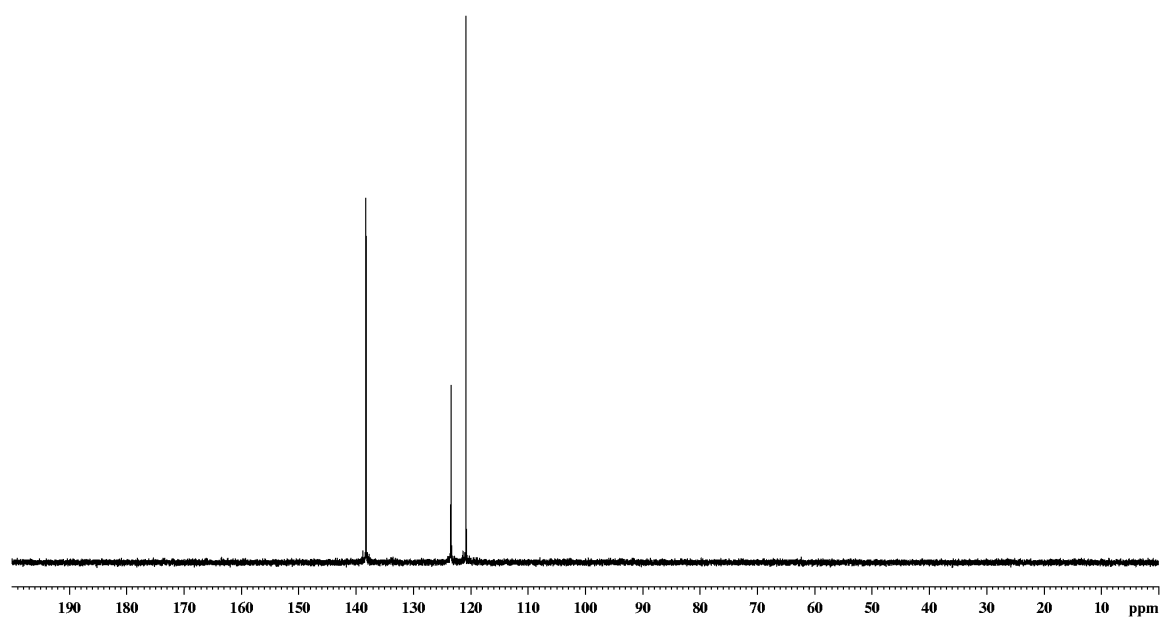



*(2S)-2-Azido-3-methylbutanoic acid*

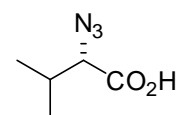

<sup>1</sup>H NMR (600 MHz, CDCl<sub>3</sub>)

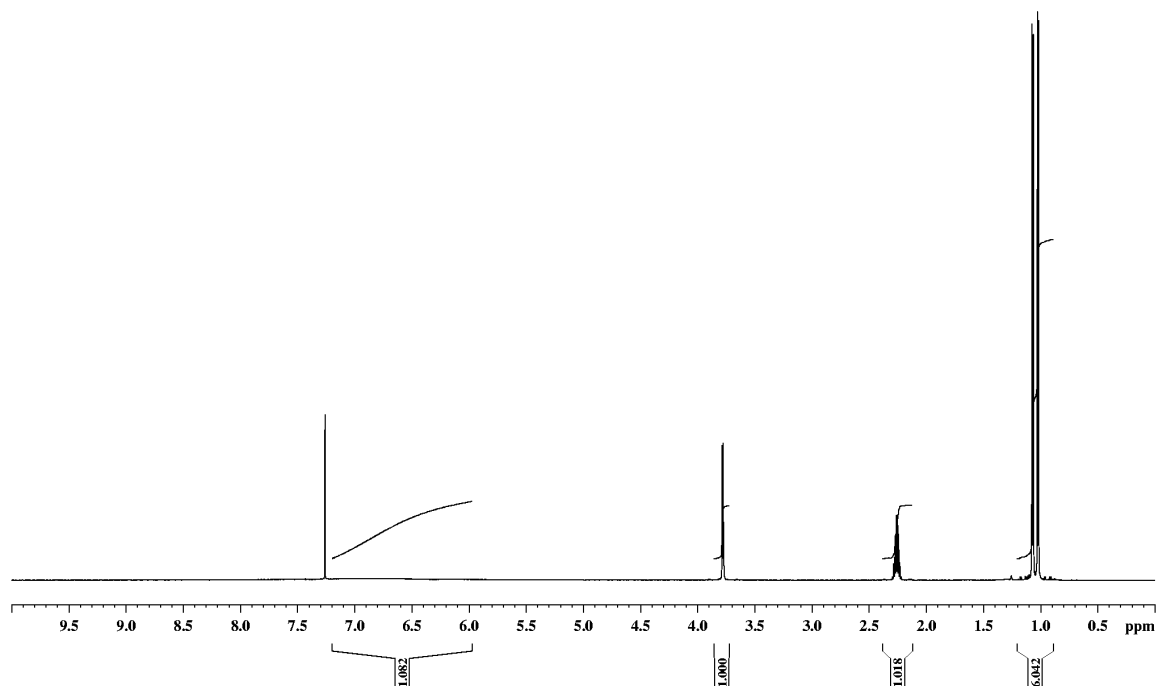

<sup>13</sup>C NMR (150.9 MHz, CDCl<sub>3</sub>)

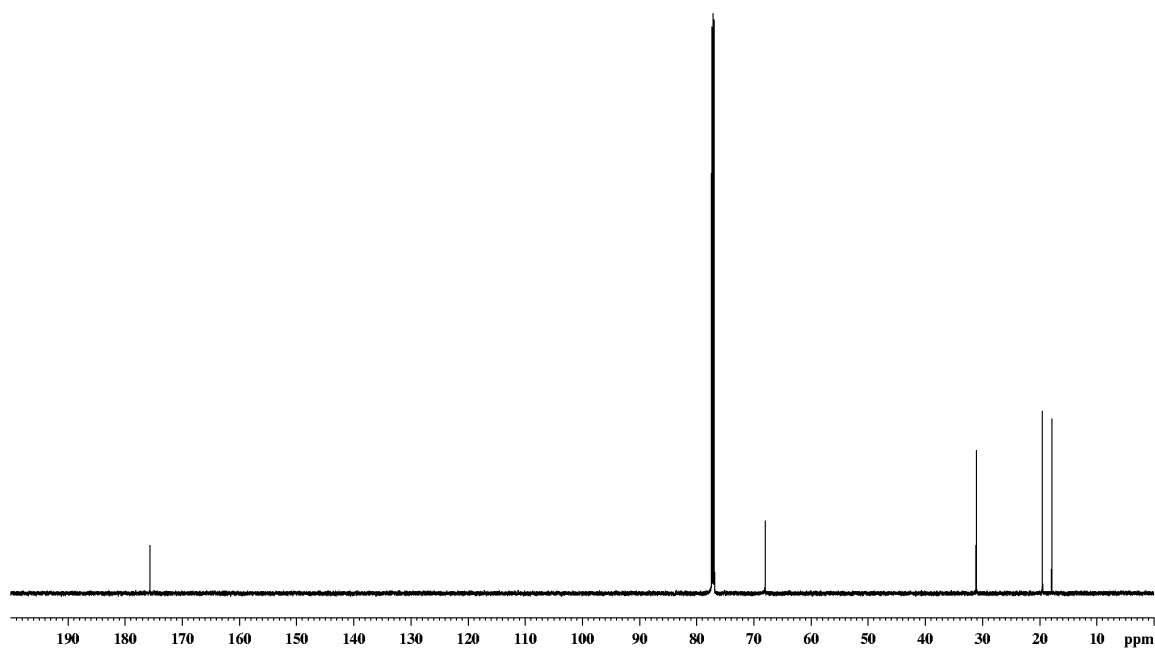

*(2S)-2-Azido-4-methylpentanoic acid*

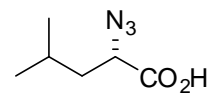

<sup>1</sup>H NMR (600 MHz, CDCl<sub>3</sub>)

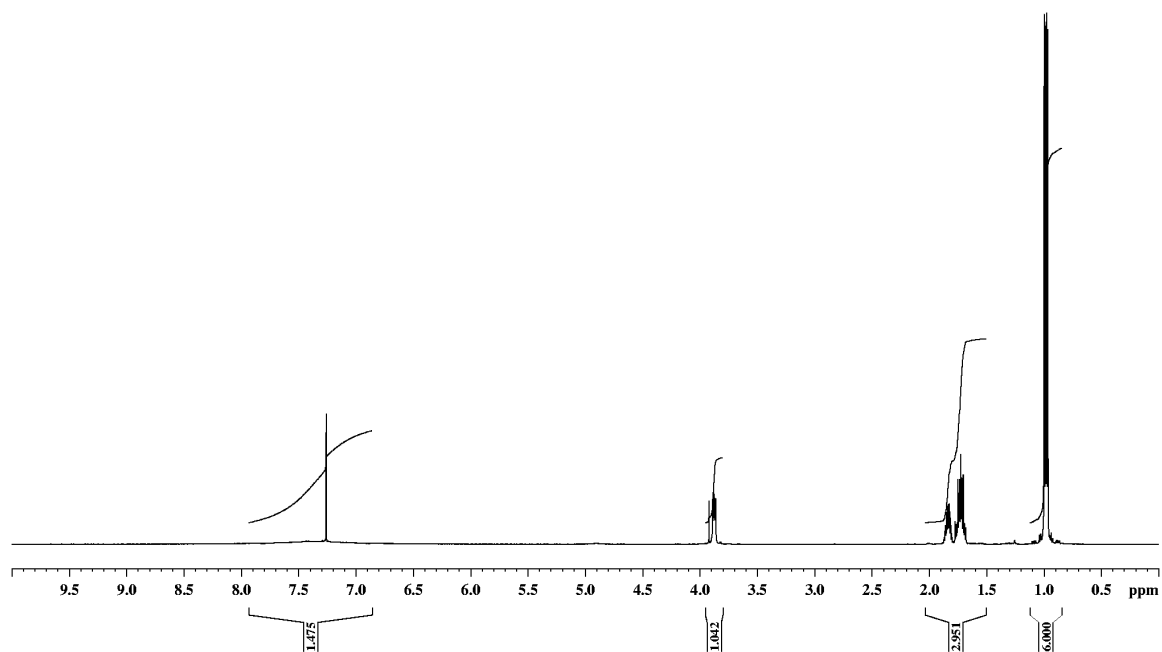

<sup>13</sup>C NMR (150.9 MHz, CDCl<sub>3</sub>)

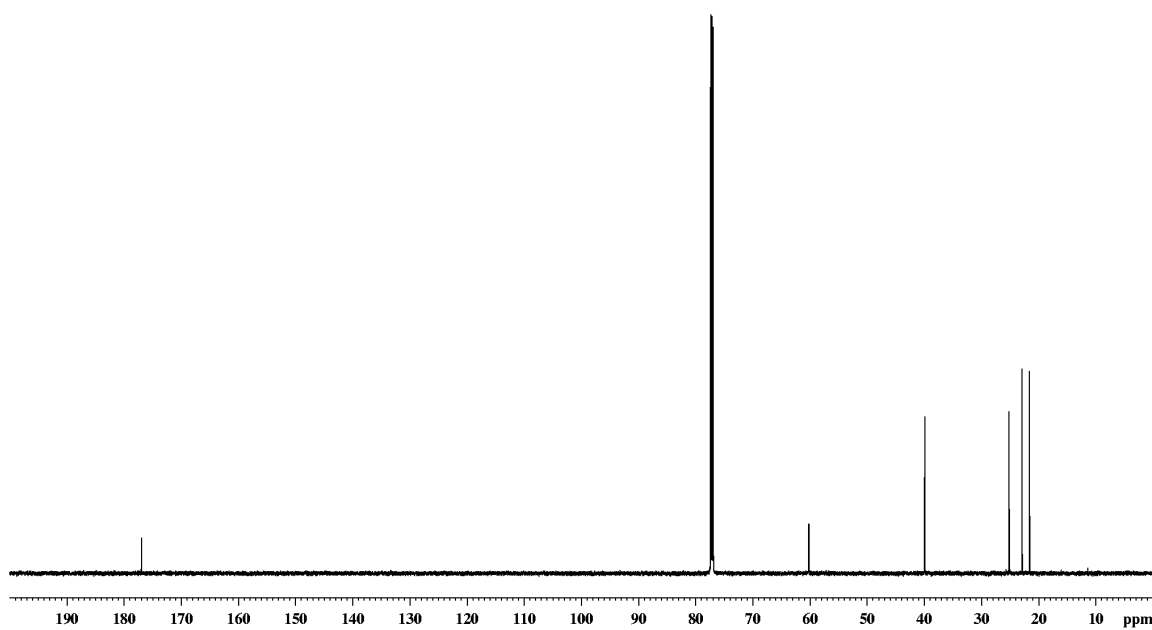

*(2S)-2,6-Diazidohexanoic Acid*

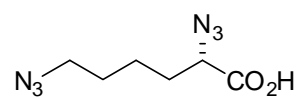

$^1\text{H}$  NMR (600 MHz,  $\text{CDCl}_3$ )

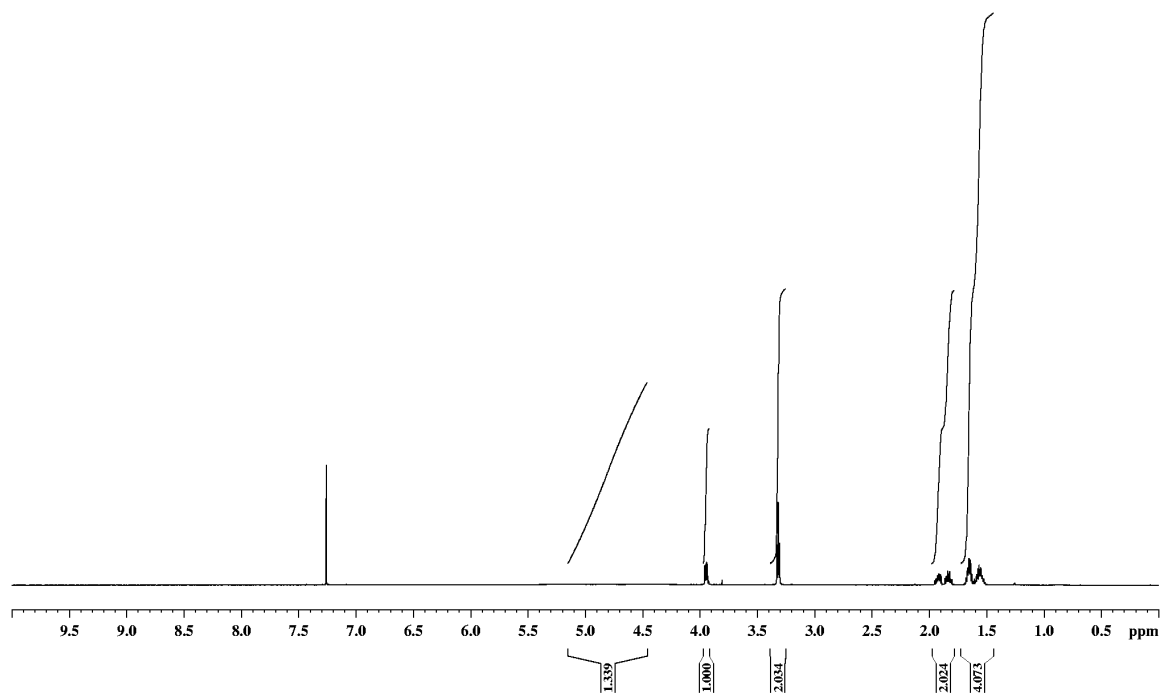

$^{13}\text{C}$  NMR (150.9 MHz,  $\text{CDCl}_3$ )

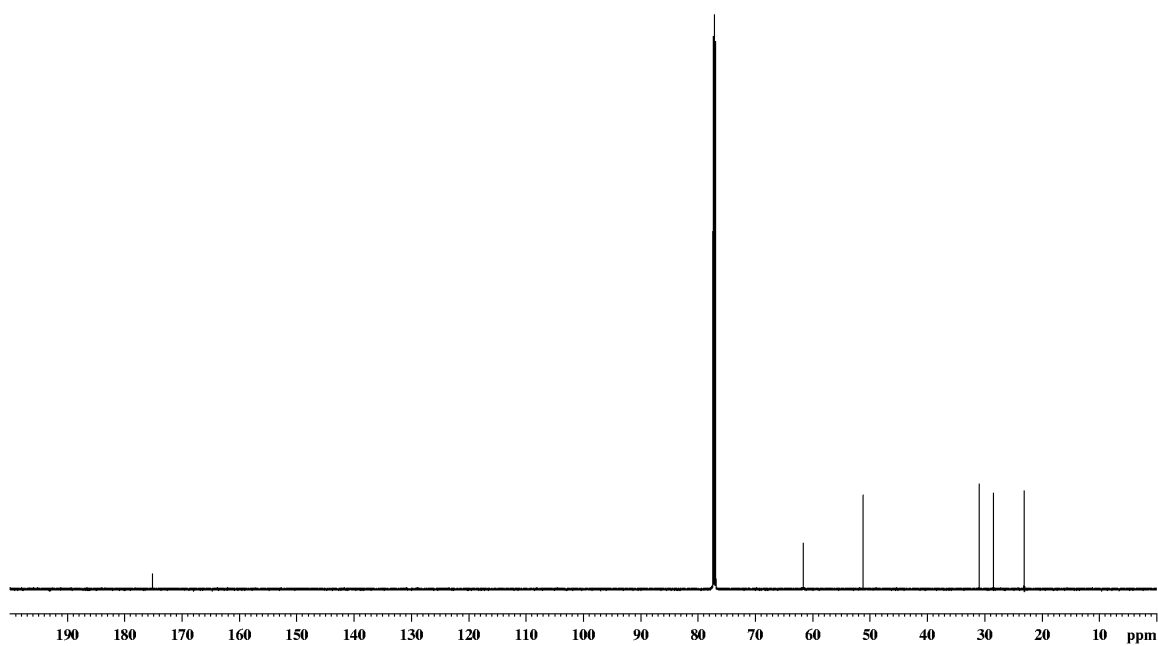

**4-Azidobutanoic Acid**

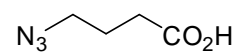

$^1\text{H}$  NMR (600 MHz,  $\text{CDCl}_3$ )

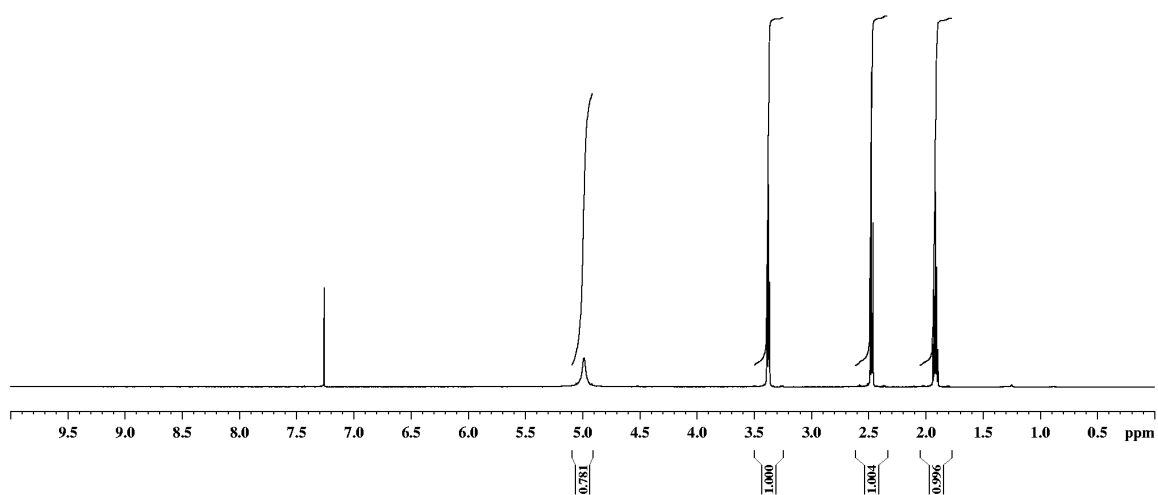

$^{13}\text{C}$  NMR (150.9 MHz,  $\text{CDCl}_3$ )

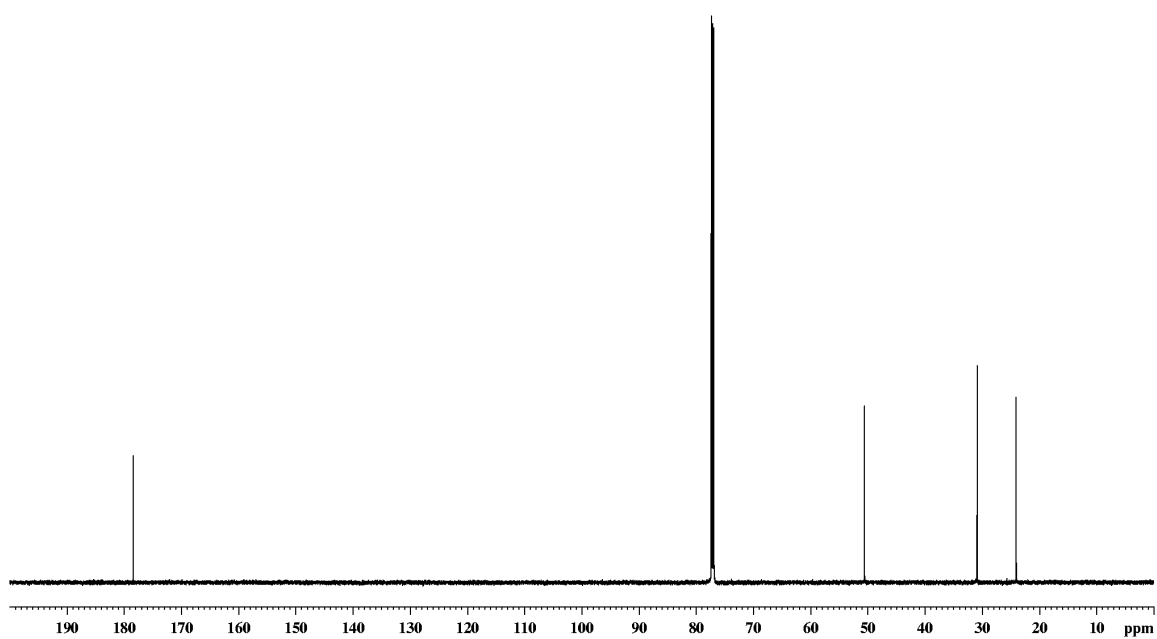

***Methyl (2S)-2-Azido-3-(4-hydroxyphenyl)propanoate***

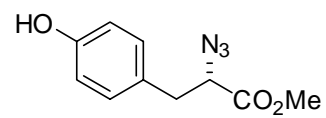

<sup>1</sup>H NMR (600 MHz, CDCl<sub>3</sub>)

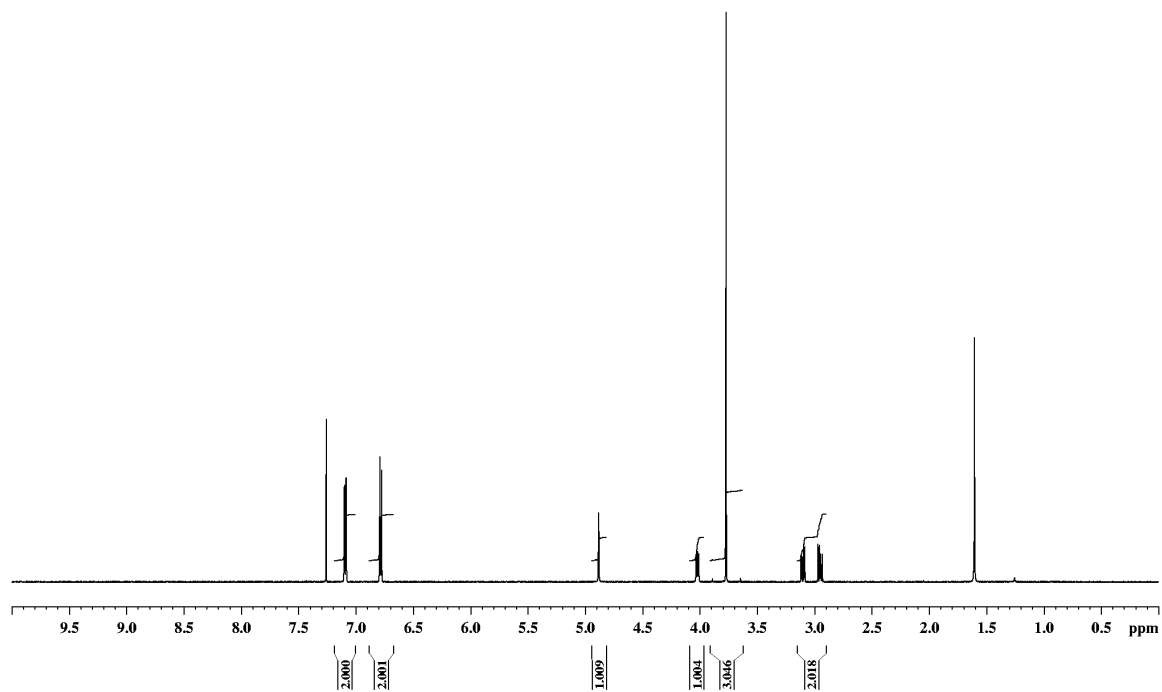

<sup>13</sup>C NMR (150.9 MHz, CDCl<sub>3</sub>)

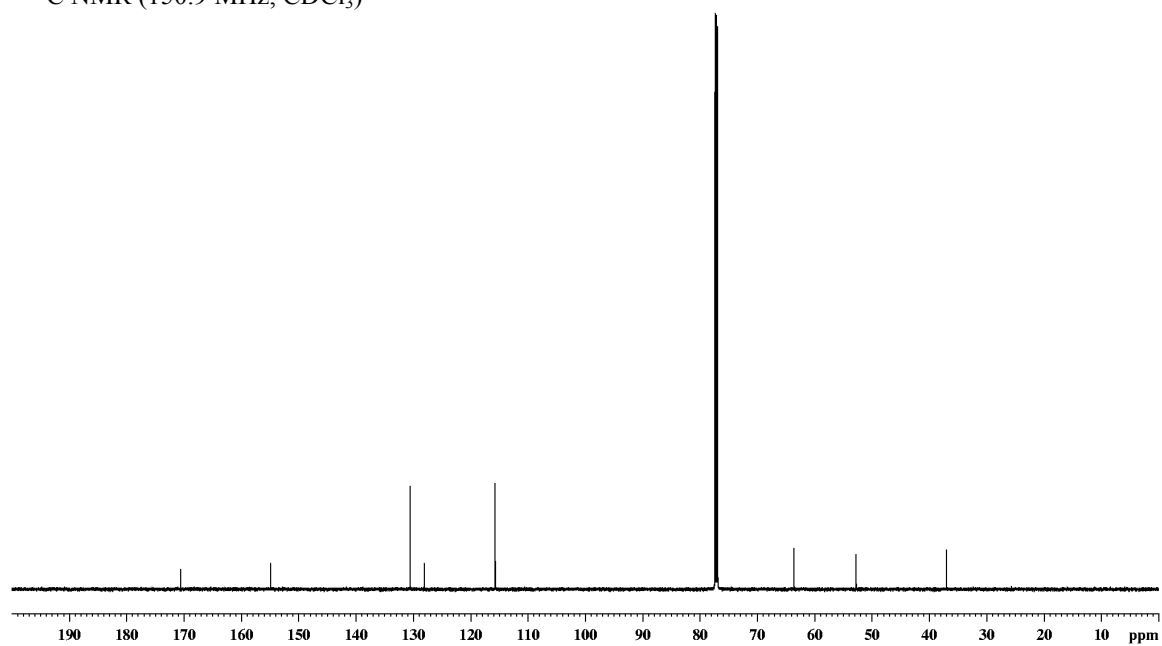

*(1S,2S)*-2-Azido-1-phenyl-1,3-propanediol

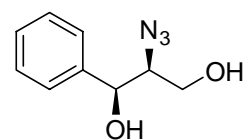

$^1\text{H}$  NMR (600 MHz,  $\text{CDCl}_3$ )

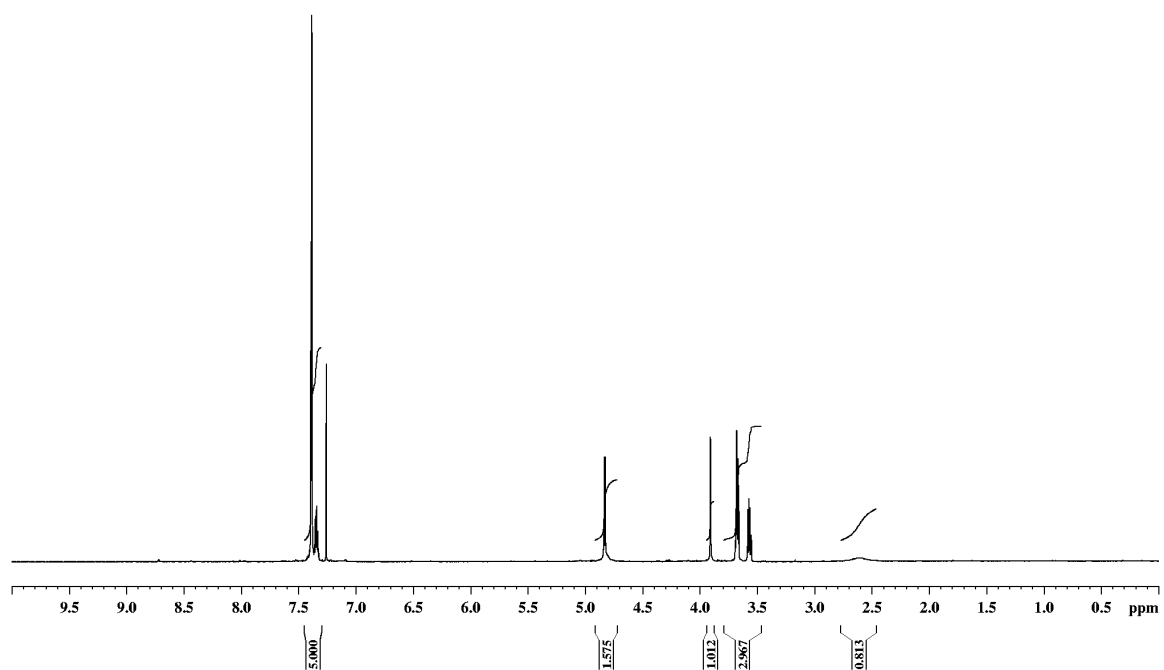

$^{13}\text{C}$  NMR (150.9 MHz,  $\text{CDCl}_3$ )

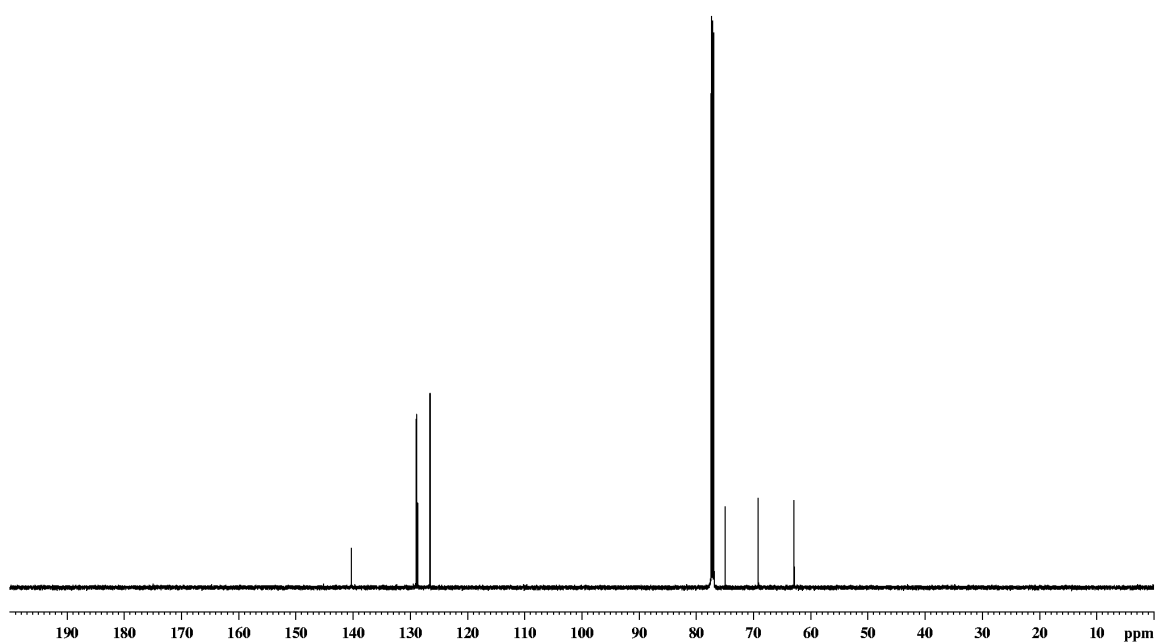

**4-Azido-1-methoxybenzene**

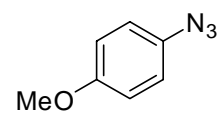

$^1\text{H}$  NMR (600 MHz,  $\text{CDCl}_3$ )

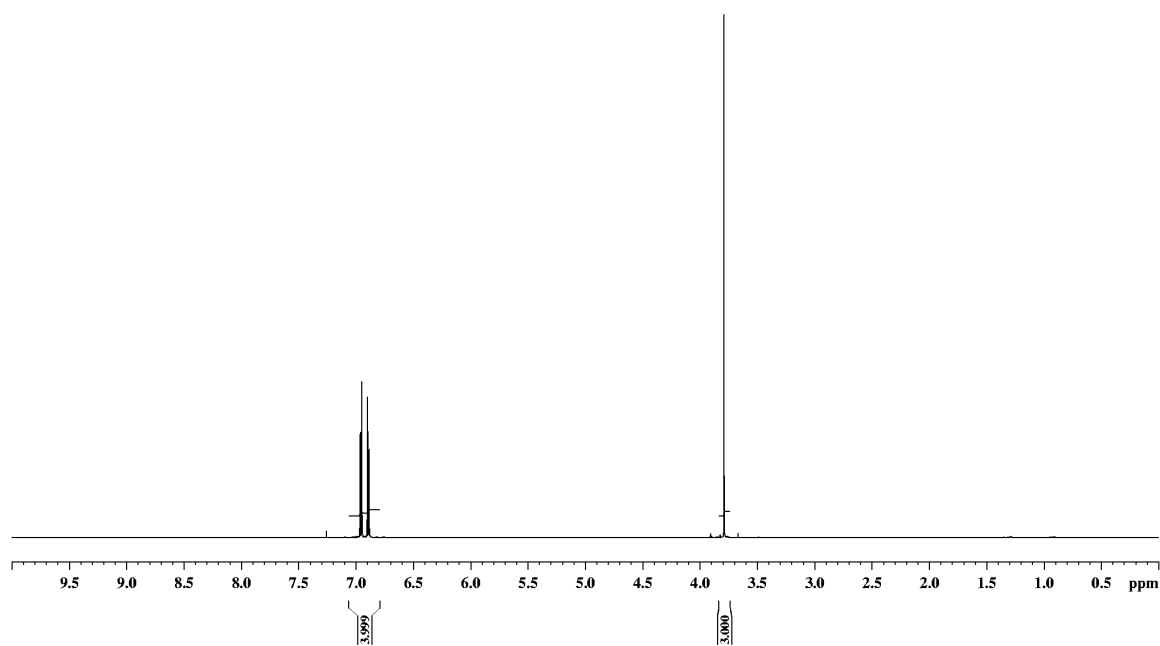

$^{13}\text{C}$  NMR (150.9 MHz,  $\text{CDCl}_3$ )

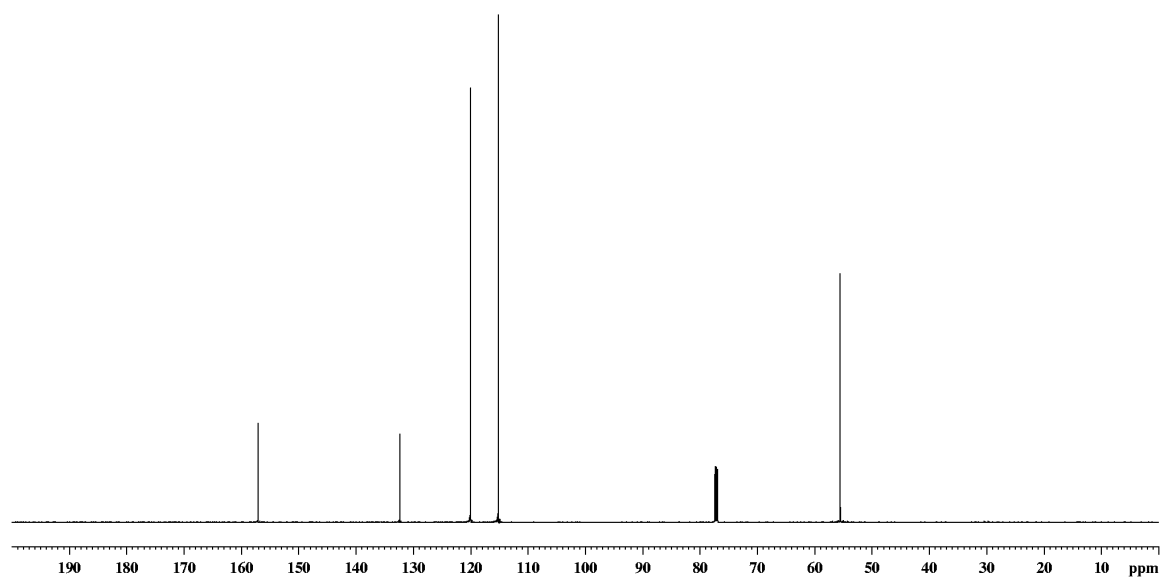

**4-Azidobenzoic acid**

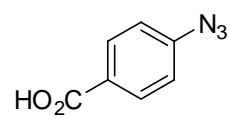

$^1\text{H}$  NMR (600 MHz,  $(\text{CD}_3)_2\text{SO}$ )

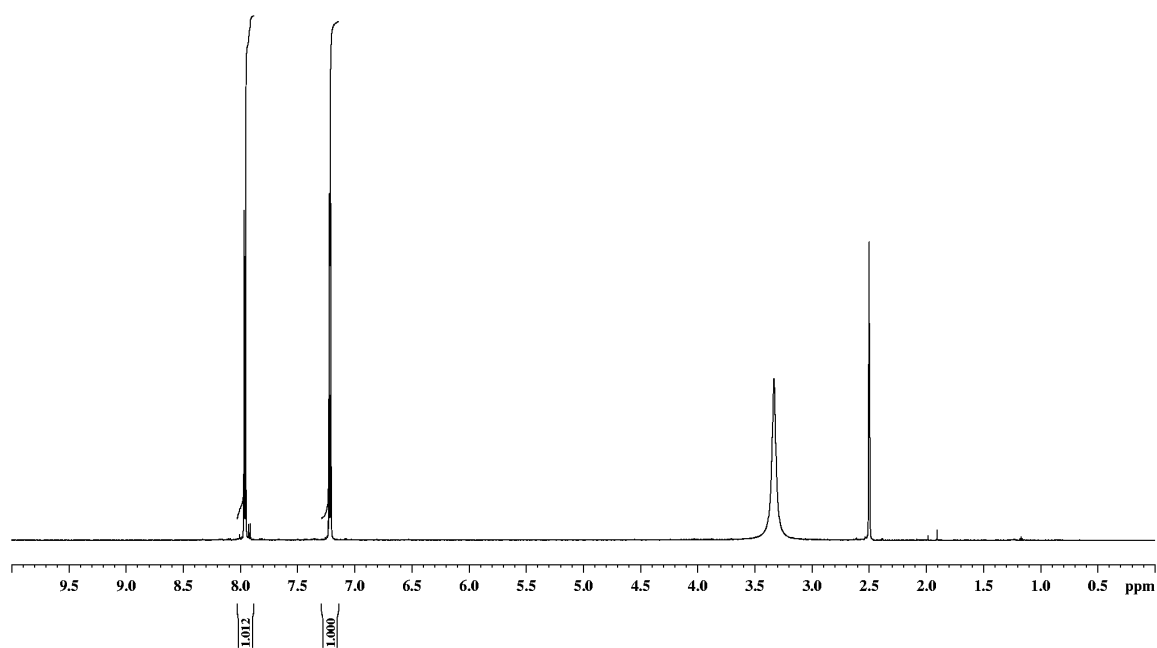

$^{13}\text{C}$  NMR (150.9 MHz,  $(\text{CD}_3)_2\text{SO}$ )

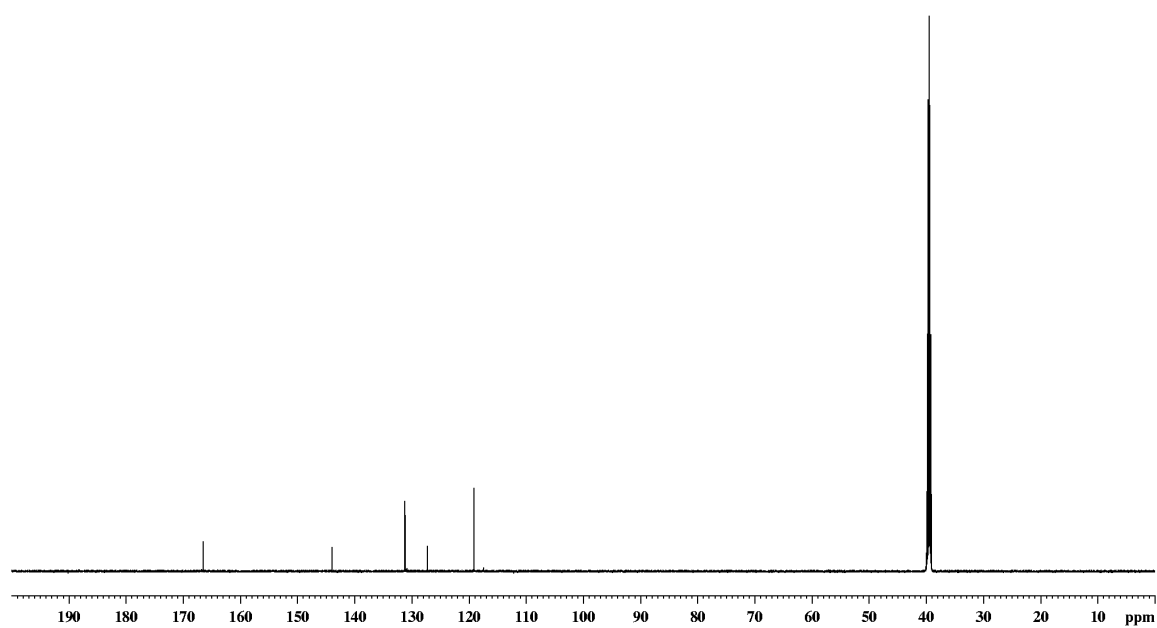



**2-Azidobenzoic acid**

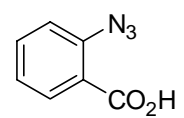

$^1\text{H}$  NMR (600 MHz,  $\text{CDCl}_3$ )

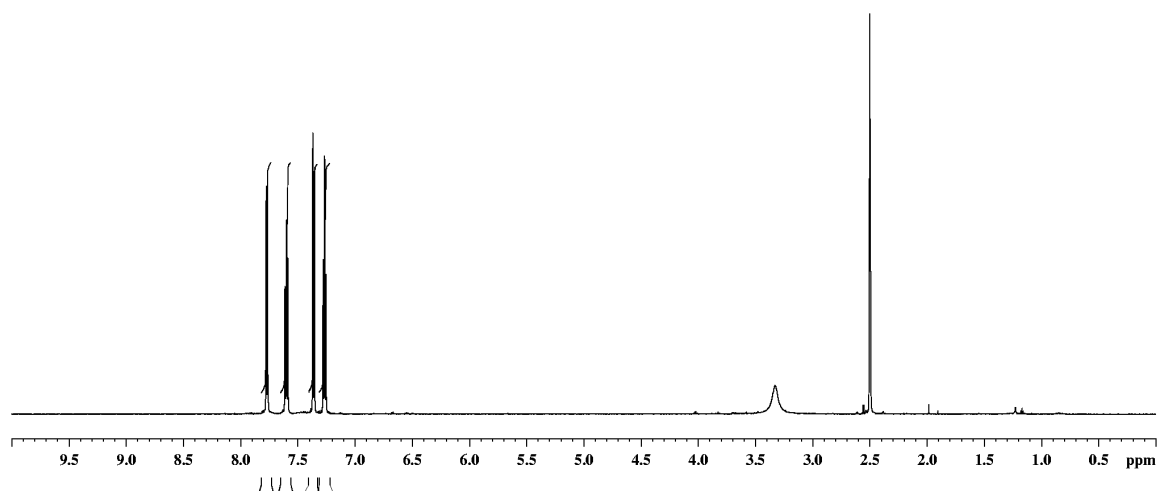

$^{13}\text{C}$  NMR (150.9 MHz,  $\text{CDCl}_3$ )

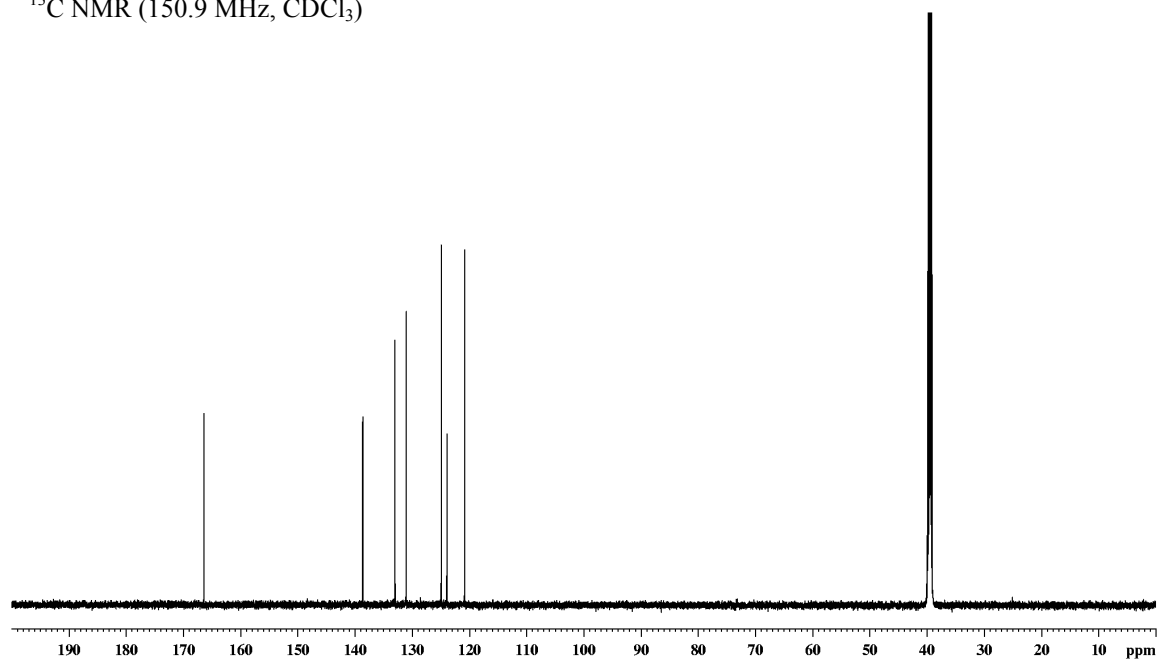

Supplement: Supplementary file 1 [file 4686781]
